# Supplementary material for: Expression and Functional Analyses of the WIP Gene Family in Arabidopsis
Source: MDPI journal article supplement (doi:10.3390/plants11152010), 2022-08-01
Supplement: s1 [file s1]

## Supplementary material

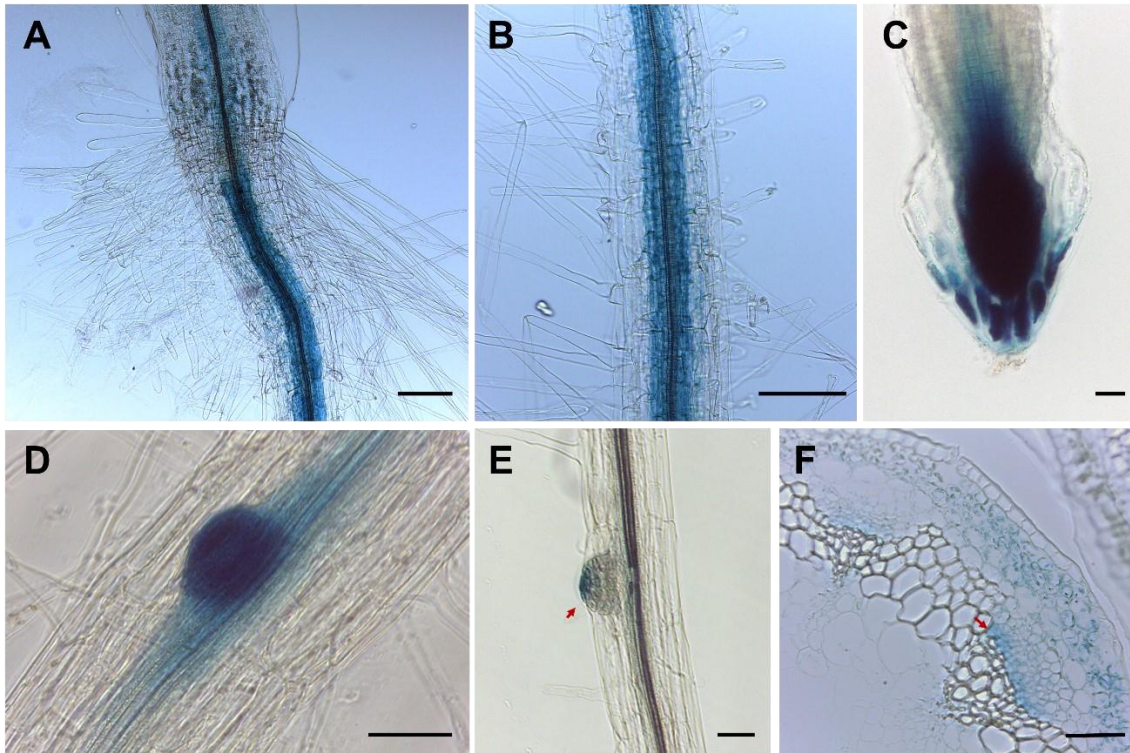

**Figure S1. *pWIP::GUS* expression in roots and stem.** A) *pWIP2::GUS* expression in the vasculature of the hypocotyl, root and the region between them at 9 dag. B) *pWIP2::GUS* expression in the vasculature of the mature root (9 dag). C) *pWIP2::GUS* expression in the root apical meristem and surrounding tissues. D) *pWIP2::GUS* expression in an emergent lateral root. E) *pWIP4::GUS* expression in the incipient root apical meristem (red arrow) of an emergent lateral root. F) Stem transversal section showing *pWIP2::GUS* expression in vascular bundle (red arrow). Scale bars represent 50  $\mu\text{m}$ .

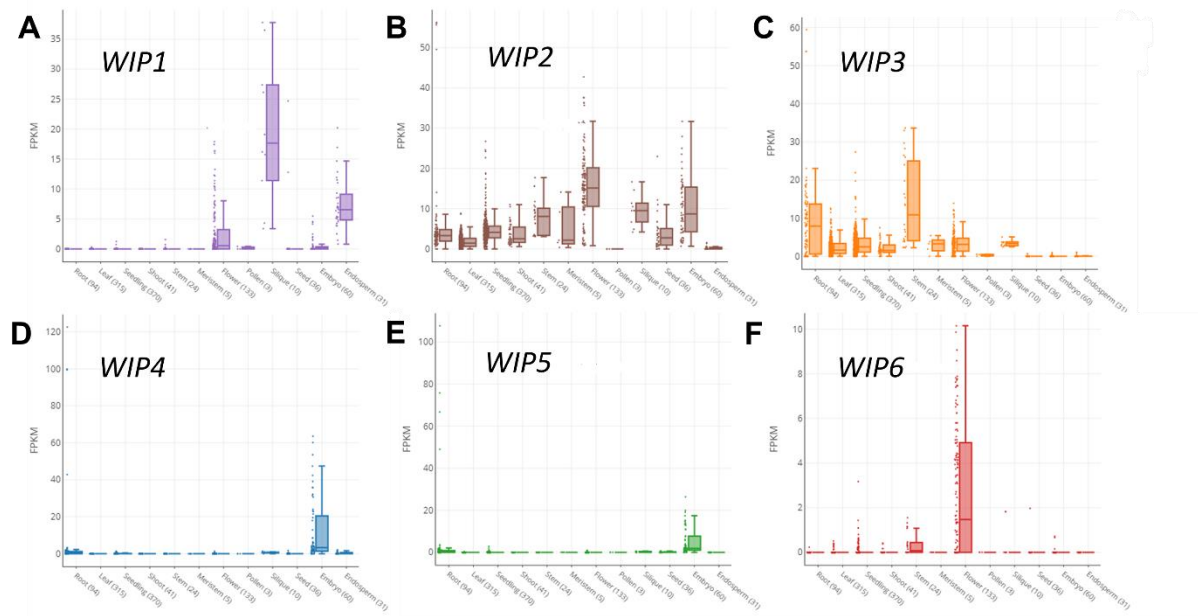

**Figure S2. RNA expression levels of *WIP* genes in different tissues.** A) AT1G34790 (*WIP1*), B) AT3G57670 (*WIP2*), C) AT1G08290 (*WIP3*), D) AT3G20880 (*WIP4*), E) AT1G51220 (*WIP5*), F) AT1G13290 (*WIP6*). Data obtained from the ARS database [21]

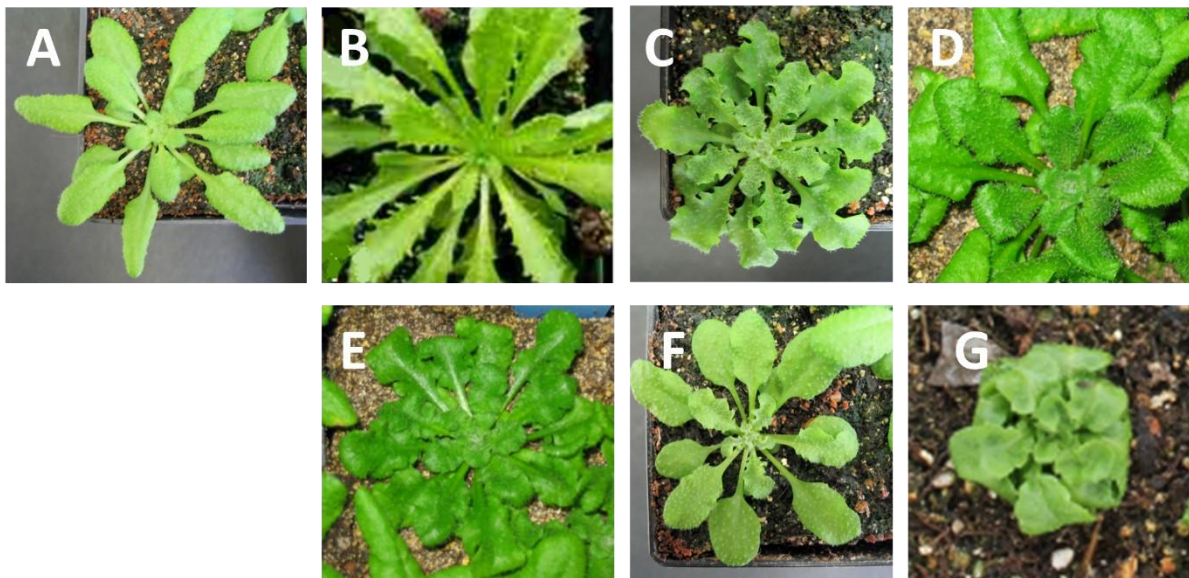

**Figure S3. Leaf edge phenotypes of *WIP* overexpressors.** A) Col-0, B) 35S::*WIP1*, C) 35S::*WIP2*, D) 35S::*WIP3*, E) 35S::*WIP4*, F) 35S::*WIP5*, G) 35S::*WIP6*. Images are presented at different magnifications, to better observe leaf edge alterations, and are not comparable in size.

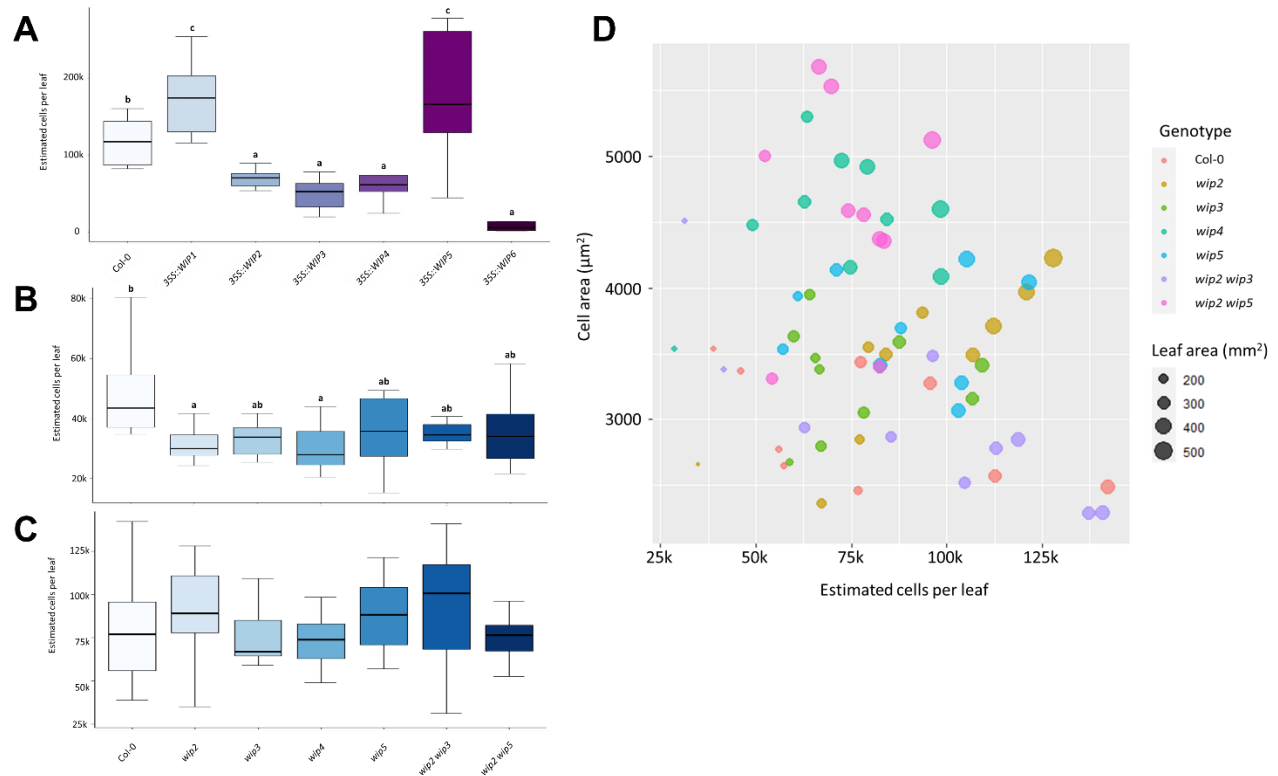

**Figure S4. Estimated cell number in *wip* mutants.** A) Estimated cell number per leaf at 35 dag in wild type plants and *WIP* overexpressors. B) Estimated cell number per leaf at 30 dag in wild type plants and *wip* mutants. Letters represent different statistic groups. C) Estimated cell number per leaf at 60 dag in wild type plants and *wip* mutants. D) Bubble plot representing the integration of leaf area, leaf cell area and estimated cell number data per leaf, of wild type and *wip* mutant plants at 60 dag.

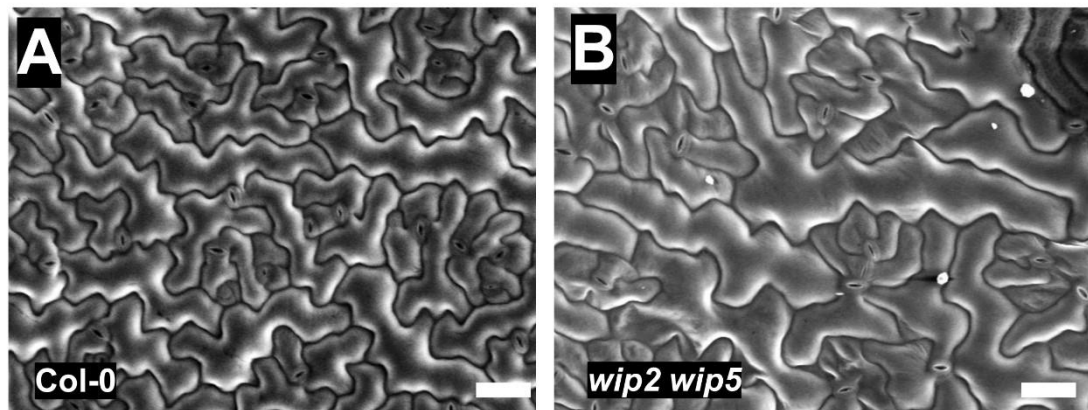

**Figure S5. Representative SEM micrographs of leaf pavement cells in wild type (A) and in *wip2 wip5* (B) leaves.** Scale bars represent 40 μm.

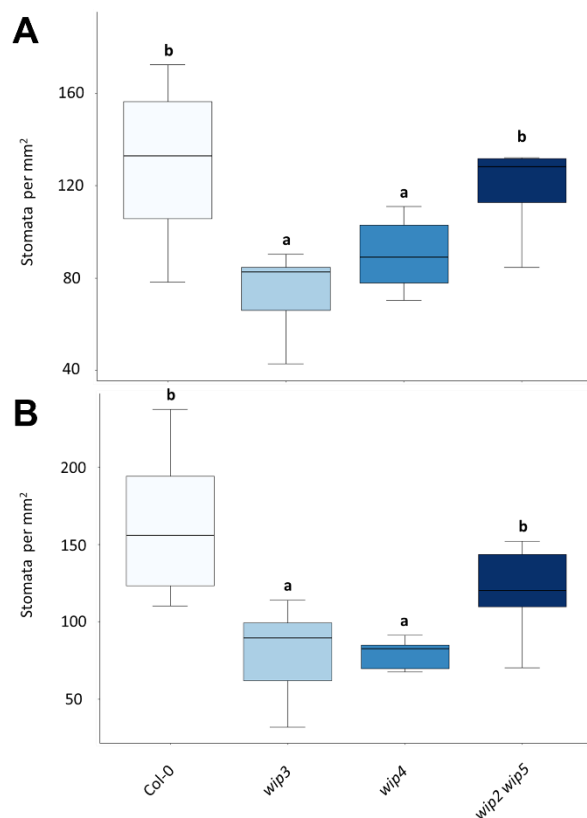

**Figure S6. Stomatal density in *wip3*, *wip4* and *wip2 wip5* mutants.** A) Stomatal density of *wip* mutants at 30 dag. B) Stomatal density of *wip* mutants at 60 dag. K.W. test p-value < 0.001 Letter represent different statistical groups. (Dunn's test).

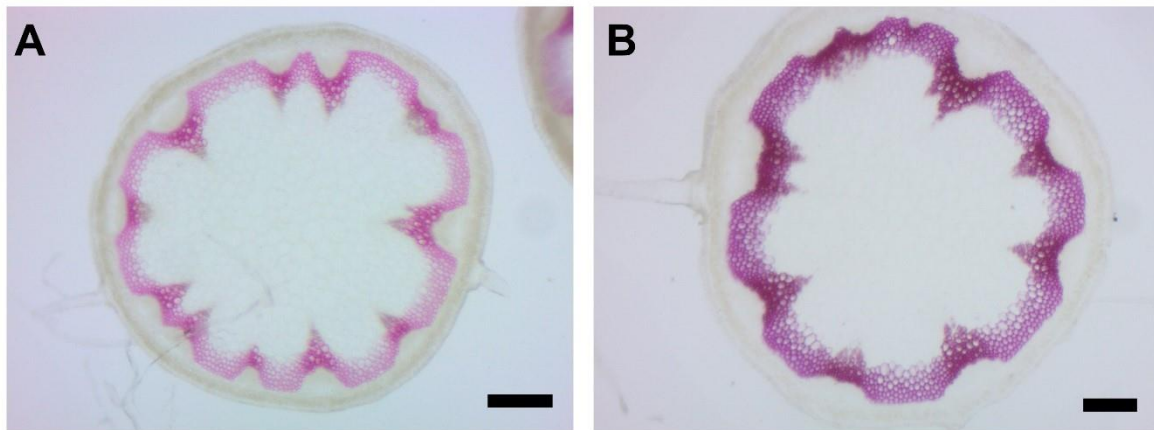

**Figure S7. Representative image of stem transverse sections, stained with phloroglucinol, where vascular bundles can be observed. Col-0 (A), and *wip2 wip5* (B) stems. Scale bars represent 200 μm.**



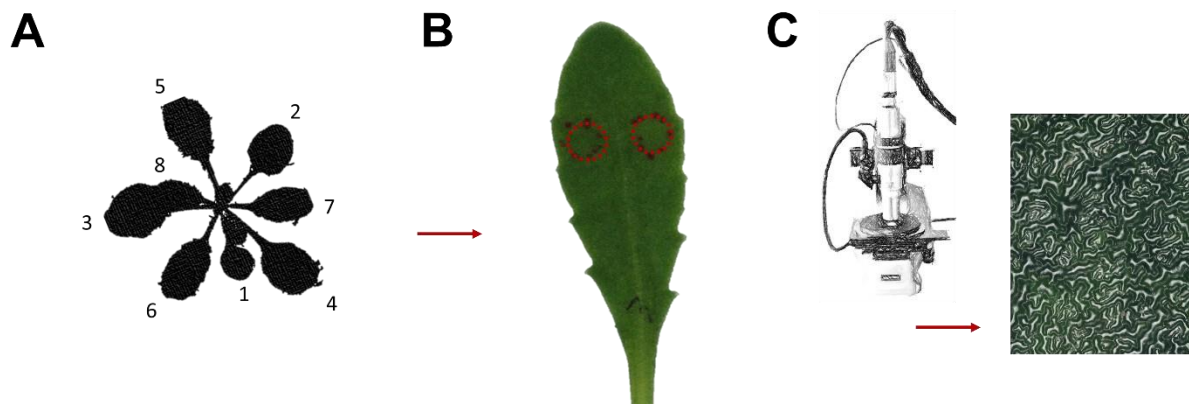

**Figure S8. Leaf imaging experiments workflow.** A) Leaves were numbered as depicted from older to younger, the 8<sup>th</sup> leaf was collected at 30 dag and the 10<sup>th</sup> at 60 dag. B) the same region was micrographed in every leaf, two regions per leaf, in each side of the central vein C) micrographs were taken with a Keyence digital microscope, and images analyzed.

**Table S1. *pWIP::GUS* expression.**

| Line              | SAM | RAM | Siliqua base | Root vasc. | Cotyledon vasc. | Leaves vasc. | Hypocotyl vasc. | Inflorescence stem vasc. |
|-------------------|-----|-----|--------------|------------|-----------------|--------------|-----------------|--------------------------|
| <i>pWIP1::GUS</i> |     |     | ✓            |            | ✓               |              |                 | ✓                        |
| <i>pWIP2::GUS</i> | ✓   | ✓   | ✓            | ✓          | ✓               | ✓            | ✓               | ✓                        |
| <i>pWIP3::GUS</i> | ✓   |     | ✓            | ✓          | ✓               | ✓            | ✓               | ✓                        |
| <i>pWIP4::GUS</i> | ✓   | ✓   | ✓            |            |                 |              |                 | ✓                        |
| <i>pWIP5::GUS</i> |     | ✓   | ✓            |            |                 |              |                 | ✓                        |
| <i>pWIP6::GUS</i> |     |     | ✓            |            |                 |              |                 | ✓                        |

**Table S2. Primers used for GUS and OE constructs and mutant analyses.**

| Gene Alias | Gene ID                 | Experiment              | Primer Name<br>(site introduced) | Sequence                                | Fragment<br>length (bp) |       |
|------------|-------------------------|-------------------------|----------------------------------|-----------------------------------------|-------------------------|-------|
| WIP3       | AT1G08290               | promoter                | S287 (EcoRI)                     | TTTGAATTCTAGTACTATTGTATTGG              | 1528                    |       |
|            |                         | GUS line                | S288 (NcoI)                      | TCTCCATGGCTCGCTTTCTCTCCTCTCTTTCAC       |                         |       |
| WIP4       | AT3G20880               | promoter                | S311 (EcoRI)                     | AGTGAATTCATCATGGTAAGCACCTATTAAGG        | 1280                    |       |
|            |                         | GUS line                | S312 (XhoI)                      | TTACTCGAGAAGATAGTGAGAAAAAAGAAGAAGAAG    |                         |       |
| WIP5       | AT1G51220               | promoter                | S307 (ClaI)                      | AGAATCGATACGAGACCACCAAAGCAAGTGC         | 1172                    |       |
|            |                         | GUS line                | S308 (NcoI)                      | AGACCATGGCTCTGAGGAGAAGACAAAGAAG         |                         |       |
| WIP6       | AT1G13290               | promoter                | S319 (EcoRI)                     | ATAGAATTCTAATAATATCATCATCACTGAGACTATCAC | 1013                    |       |
|            |                         | GUS line                | S310 (NcoI)                      | TCTCCATGGAGTAGAGAGAAAGAGAGATGA          |                         |       |
| WIP5       | AT1G51220               | CDS cloning             | S245 (NcoI)                      | AGACCATGGCTTCTAATCCAGCTTGTTCTGAATCTC    | 1014                    |       |
|            |                         |                         | S267 (SacI)                      | TATGAGCTCATTGCTCGATATCAGAAGCAGCATC      |                         |       |
| WIP2       | Primer name             |                         |                                  |                                         | Allele                  |       |
|            | AT3G57670               | Genotyping<br>gene      | Sdf222                           | TCTCTTCACCATGACTGATCC                   | ntt-2                   |       |
|            |                         |                         | Sdf223                           | GCTATTTAGACTGCATTGACTC                  |                         |       |
|            |                         | Genotyping<br>insertion | IC77                             | CTTACCTTTTTTCTGTAGTG                    |                         | ntt-3 |
|            |                         |                         | Sdf277                           | CATCGTCATCTTCTCCTCTCC                   |                         |       |
|            |                         |                         | IC51                             | ATTTTGCCGATTCGGAAC                      |                         |       |
|            |                         |                         | Sdf223                           | GCTATTTAGACTGCATTGACTC                  |                         |       |
|            |                         | AT1G08290               | Genotyping<br>gene               | IC13                                    | AGGATGATGTGGTTACCCTCC   |       |
|            |                         |                         |                                  | IC14                                    | TATTGCGAATGATACACCAACCG |       |
|            | Genotyping<br>insertion |                         | IC13                             | AGGATGATGTGGTTACCCTCC                   |                         |       |
|            |                         |                         | IC51                             | ATTTTGCCGATTCGGAAC                      |                         |       |
|            | AT3G20880               | Genotyping<br>gene      | IC60                             | GAACTGCGCAAAAATCAAGAG                   |                         |       |
|            |                         |                         | IC61                             | TCCCTCTCACGCATCTACAAC                   |                         |       |
|            |                         | Genotyping<br>insertion | IC60                             | GAACTGCGCAAAAATCAAGAG                   |                         |       |
|            |                         |                         | IC62                             | ATAATAACGCTGCGGACATCTACATTTT            |                         |       |
|            | AT1G51220               | Genotyping<br>gene      | Sdf299                           | CCTCAGAGTCATGTCTAATCCAG                 |                         |       |
|            |                         |                         | Sdf300                           | TCTTATTGCTCGATATCAGAAGC                 |                         |       |
|            |                         | Genotyping<br>insertion | IC51                             | ATTTTGCCGATTCGGAAC                      |                         |       |
|            |                         |                         | Sdf300                           | TCTTATTGCTCGATATCAGAAGC                 |                         |       |
|            | WIP1                    | AT1G34790               | transcript                       | S152                                    | ATGGAGTCACCACCACTATAC   |       |
| WIP2       | AT3G57670               | transcript              | GH01                             | AAAAAACAAAGTCTCGGAGAC                   |                         |       |
|            |                         |                         | GH45                             | ATTTAGACTGCATTGACTCATG                  |                         |       |
| WIP3       | AT1G08290               | transcript              | S183                             | ATTCTTATGAGACGAAAGGC                    |                         |       |
|            |                         |                         | GH46                             | ACTCTGTGGTGACGCATTC                     |                         |       |
| WIP4       | AT3G20880               | transcript              | S243                             | CTATTTTCCACTGTTTTGTCACATCG              |                         |       |
|            |                         |                         | GH47                             | ATTCTTGCTGCTCGACATCAG                   |                         |       |
| WIP5       | AT1G51220               | transcript              | S245                             | TCTAATCCAGCTTGTTCTGAATCTC               |                         |       |
|            |                         |                         | GH48                             | ATTGCTCGATATCAGAAGCAG                   |                         |       |
| WIP6       | AT1G13290               | transcript              | S247                             | TATAATAATAACCAATATAGCTTCTCC             |                         |       |
|            |                         |                         | GH49                             | AGTAATTGTCATCAGAAATCTGAC                |                         |       |

Table S3. Mutant *wip* lines used in this study.

| <i>wip</i> mutants | Line                                     | Gene ID                 |
|--------------------|------------------------------------------|-------------------------|
| <i>wip2 (ntt)</i>  | <sup>▮</sup> SM_3_16705                  | AT3G57670               |
| <i>wip3</i>        | *SALK_072471                             | AT1G08290               |
| <i>wip4</i>        | <sup>ϕ</sup> gabi_176E02                 | AT3G20880               |
| <i>wip5</i>        | *SALK_114838                             | AT1G51220               |
| <i>wip2wip3</i>    | *SALK_007406C,<br>*SALK_072471           | AT3G57670,<br>AT1G08290 |
| <i>wip2wip5</i>    | <sup>▮</sup> SM_3_16705,<br>*SALK_114838 | AT3G57670,<br>AT1G51220 |

<sup>▮</sup> [22], \*[23], <sup>ϕ</sup>[24].
